# Supplementary material for: Pedoclimatic Conditions Influence the Morphological, Phytochemical and Biological Features of Mentha pulegium L
Source: MDPI journal article supplement (doi:10.3390/plants12010024), 2022-12-21
Supplement: s1 [file s1]

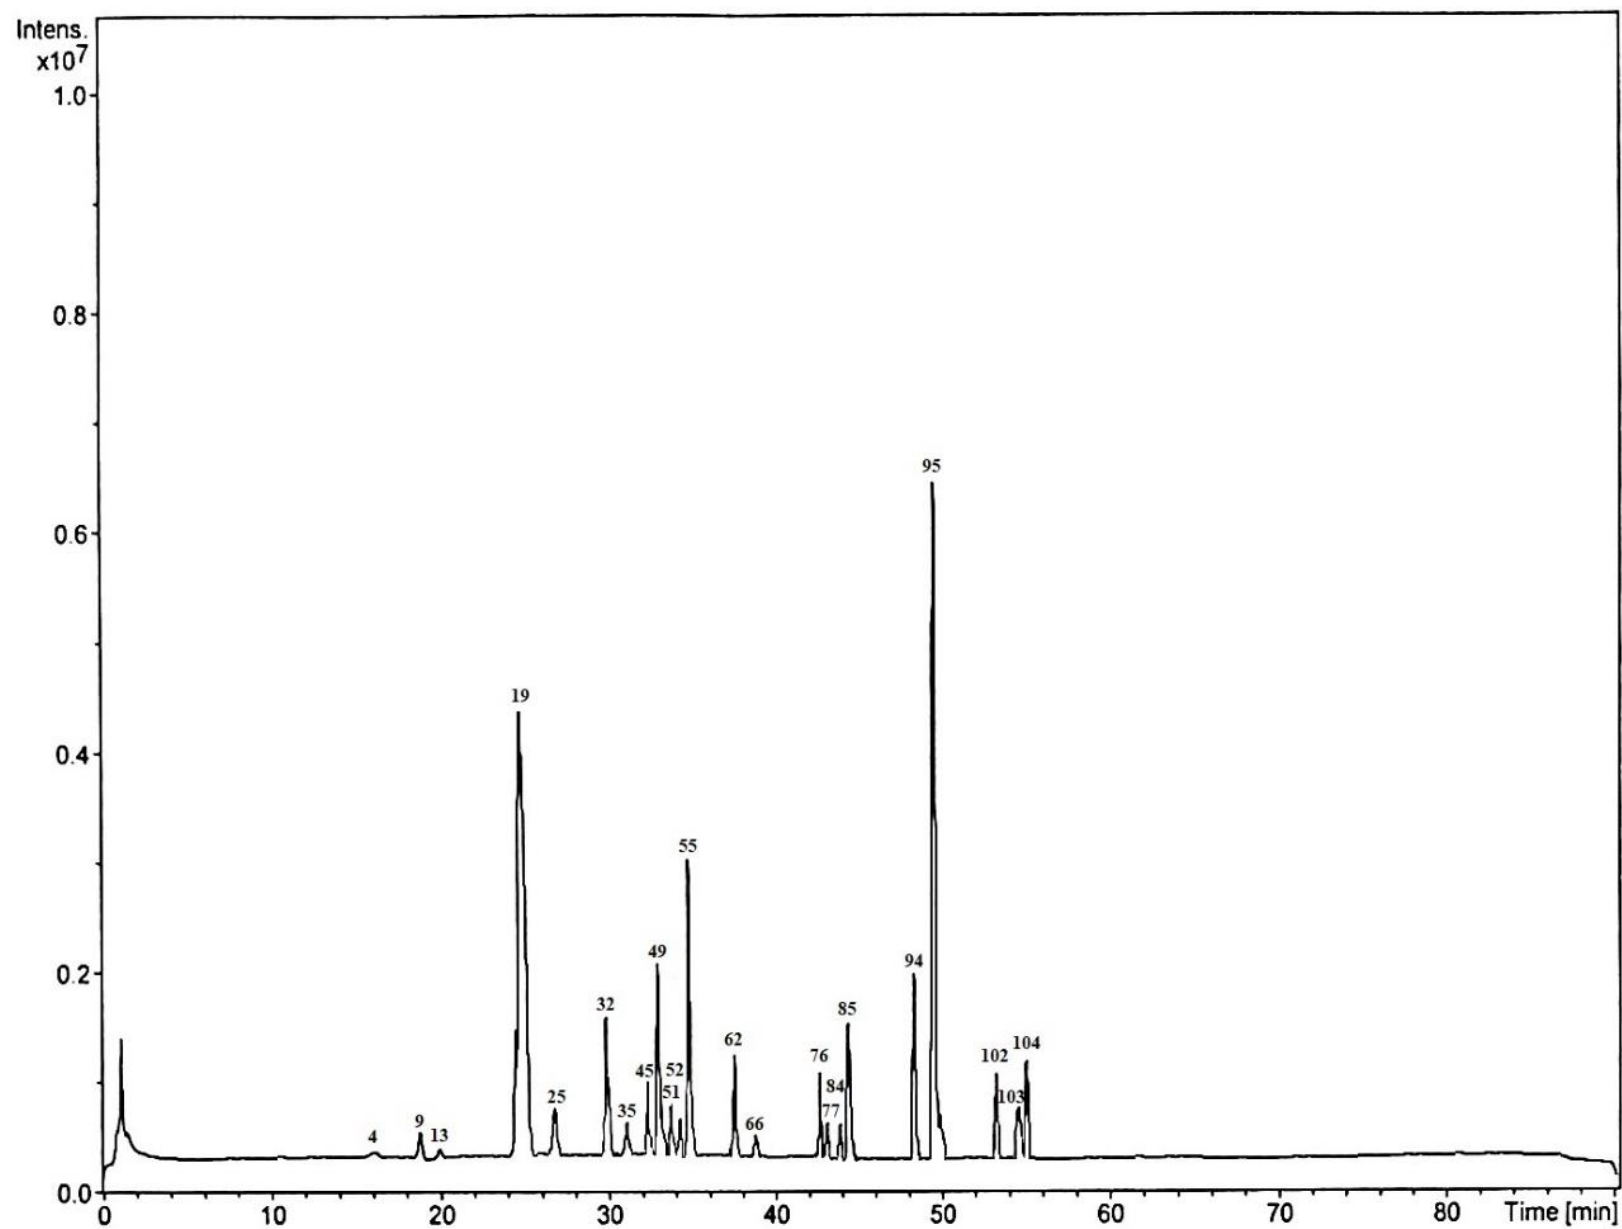

**Figure S1.** Representative LC-MS chromatogram of *M. pulegium* leaf extract I (MPLE I). Peak numbers refer to compounds listed in Table 3.

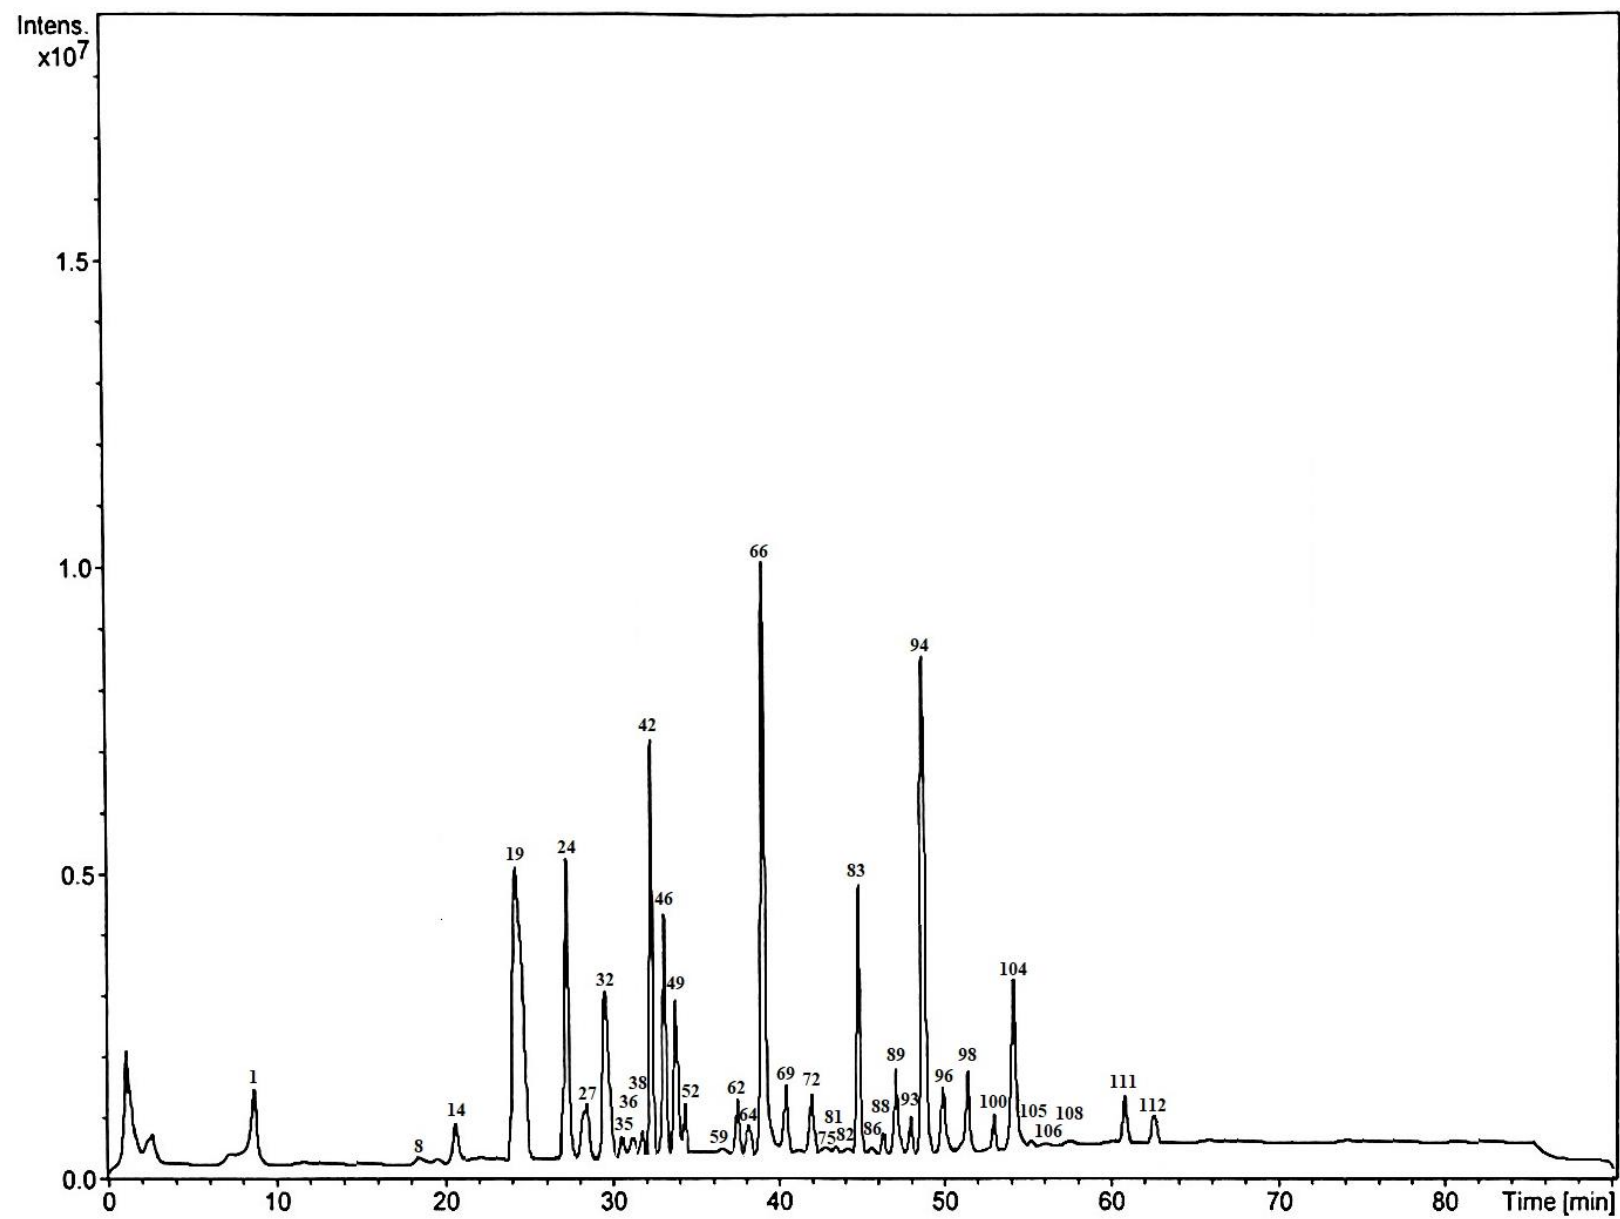

**Figure S2.** Representative LC-MS chromatogram of *M. pulegium* leaf extract II (MPLE II). Peak numbers refer to compounds listed in Table 3.

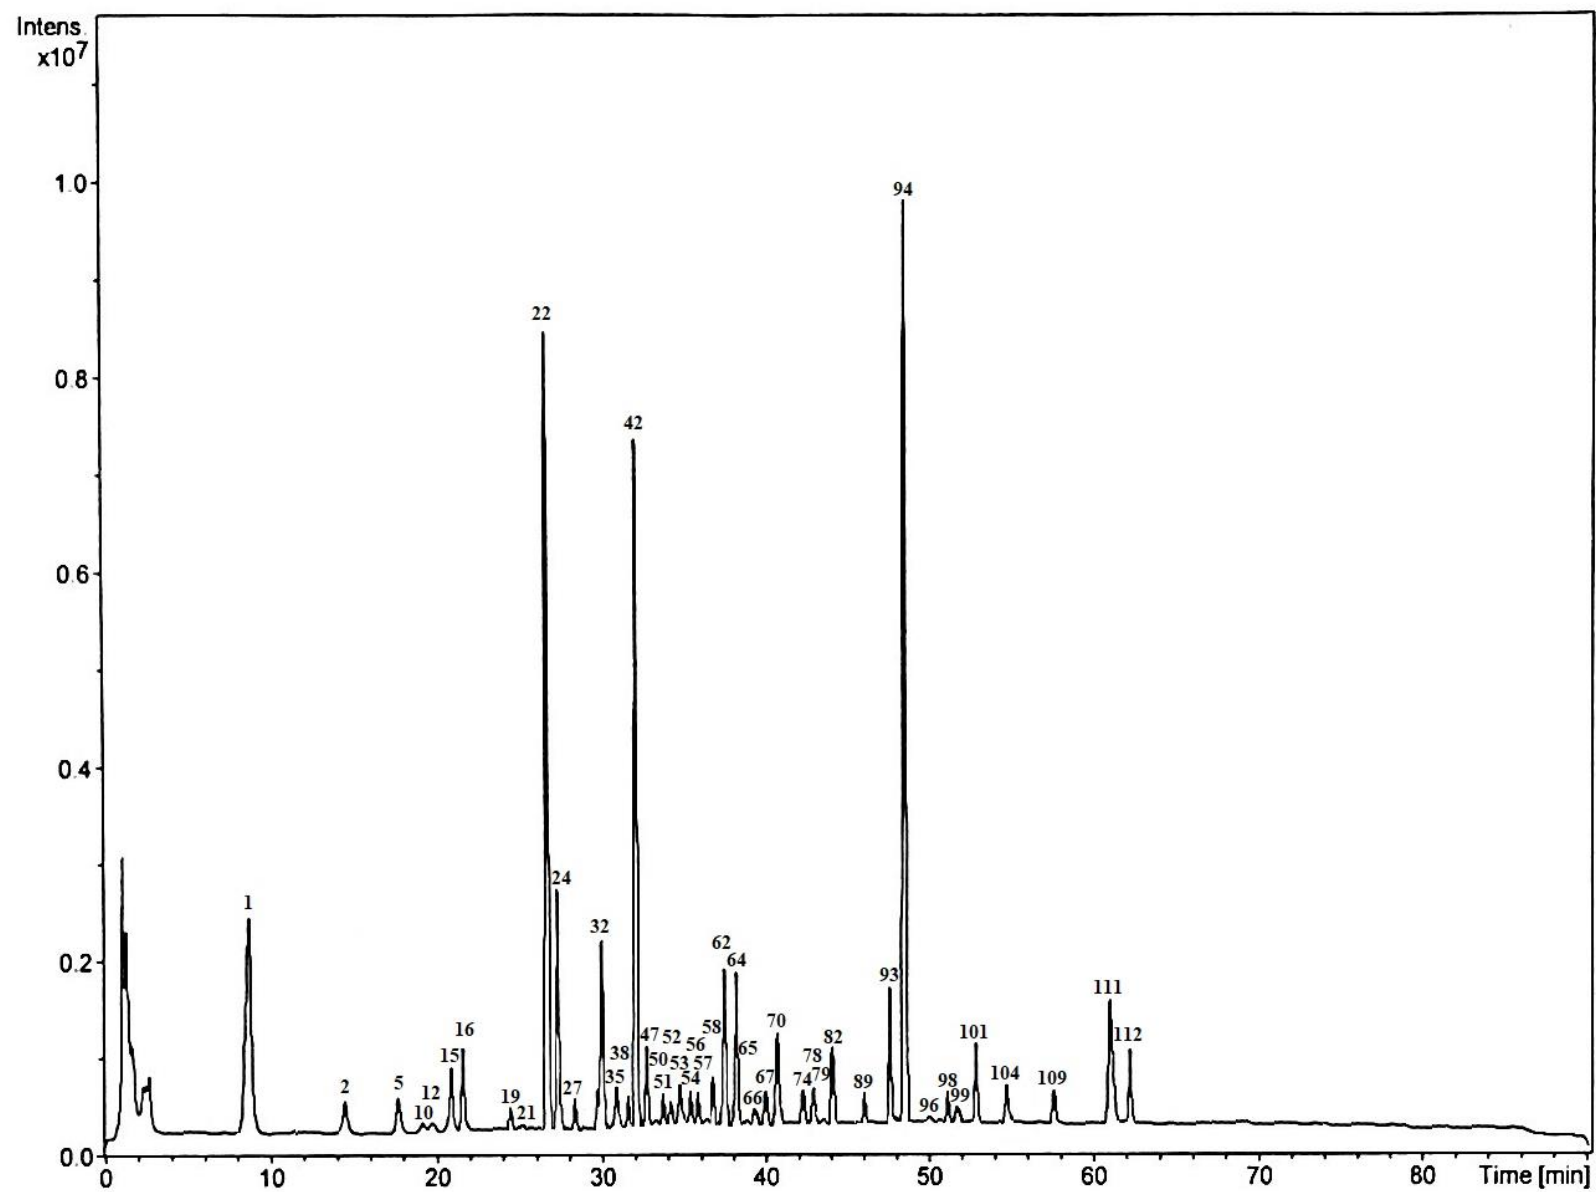

**Figure S3.** Representative LC-MS chromatogram of *M. pulegium* leaf extract III (MPLE III). Peak numbers refer to compounds listed in Table 3.

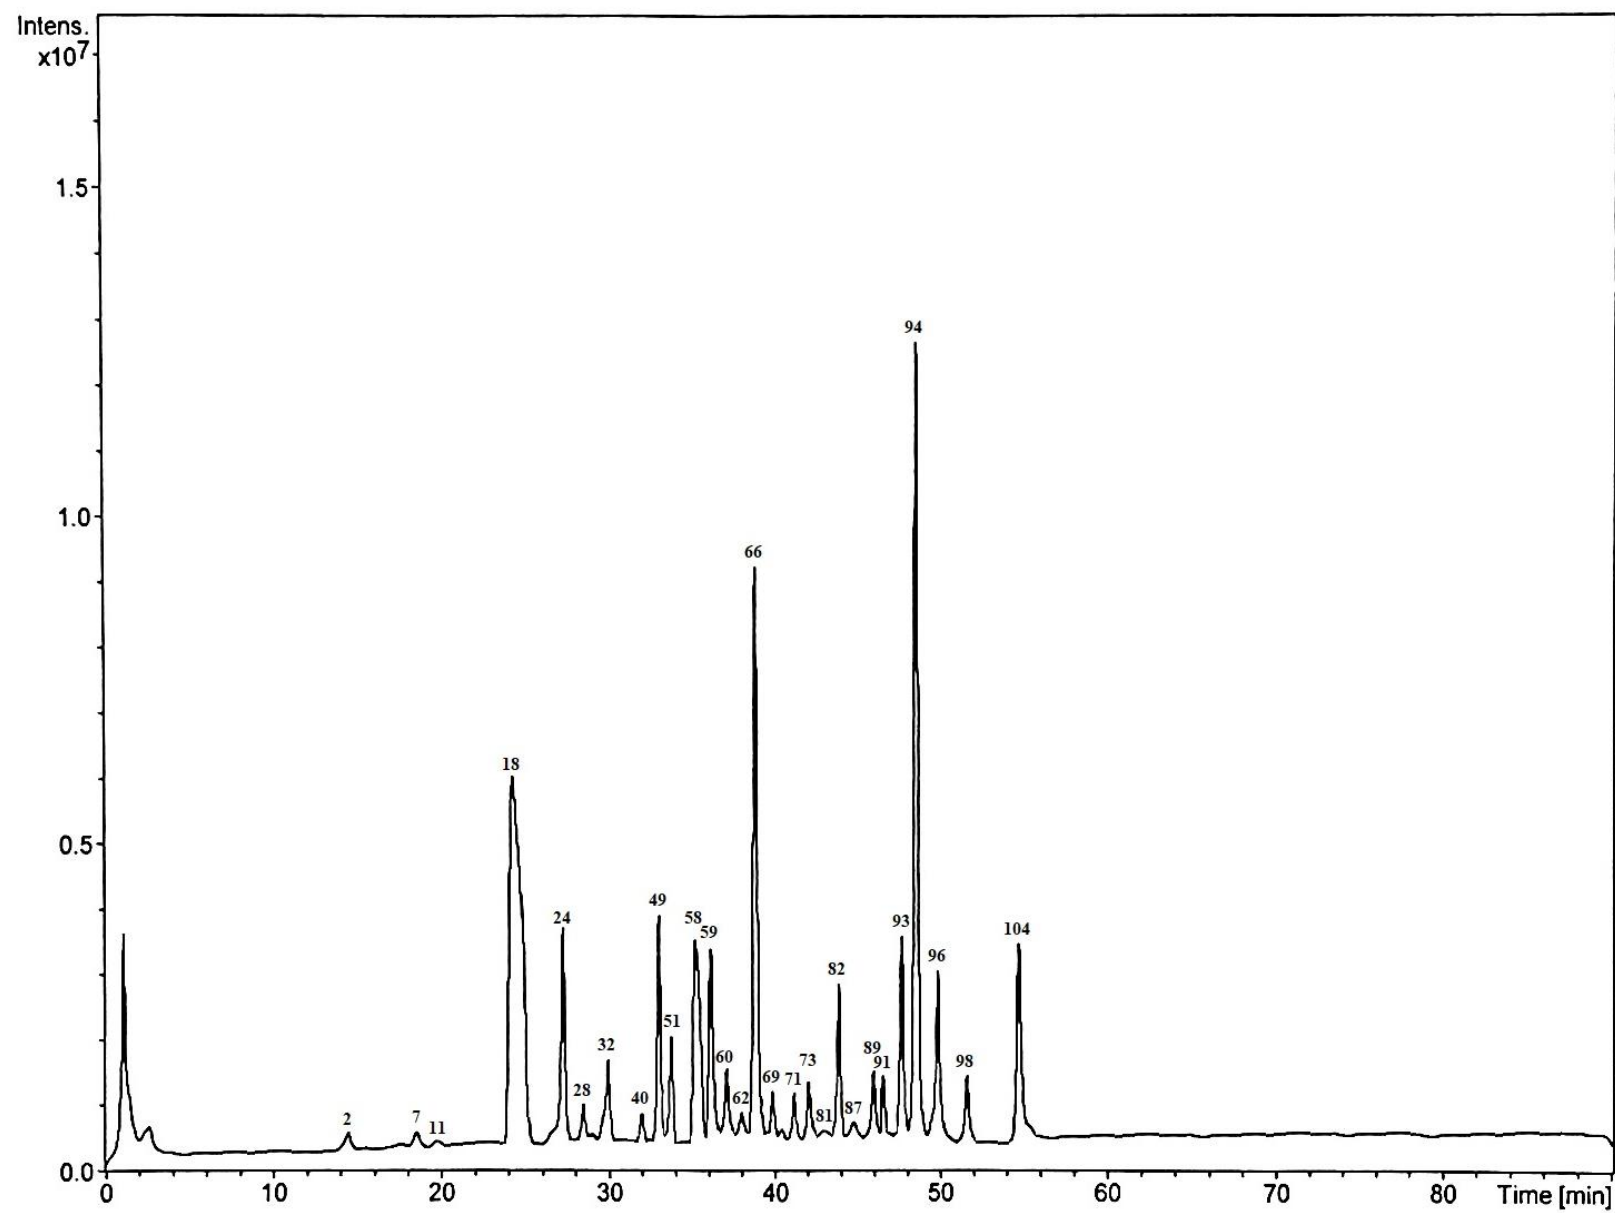

**Figure S4.** Representative LC-MS chromatogram of *M. pulegium* flower extract I (MPFE I). Peak numbers refer to compounds listed in Table 3.

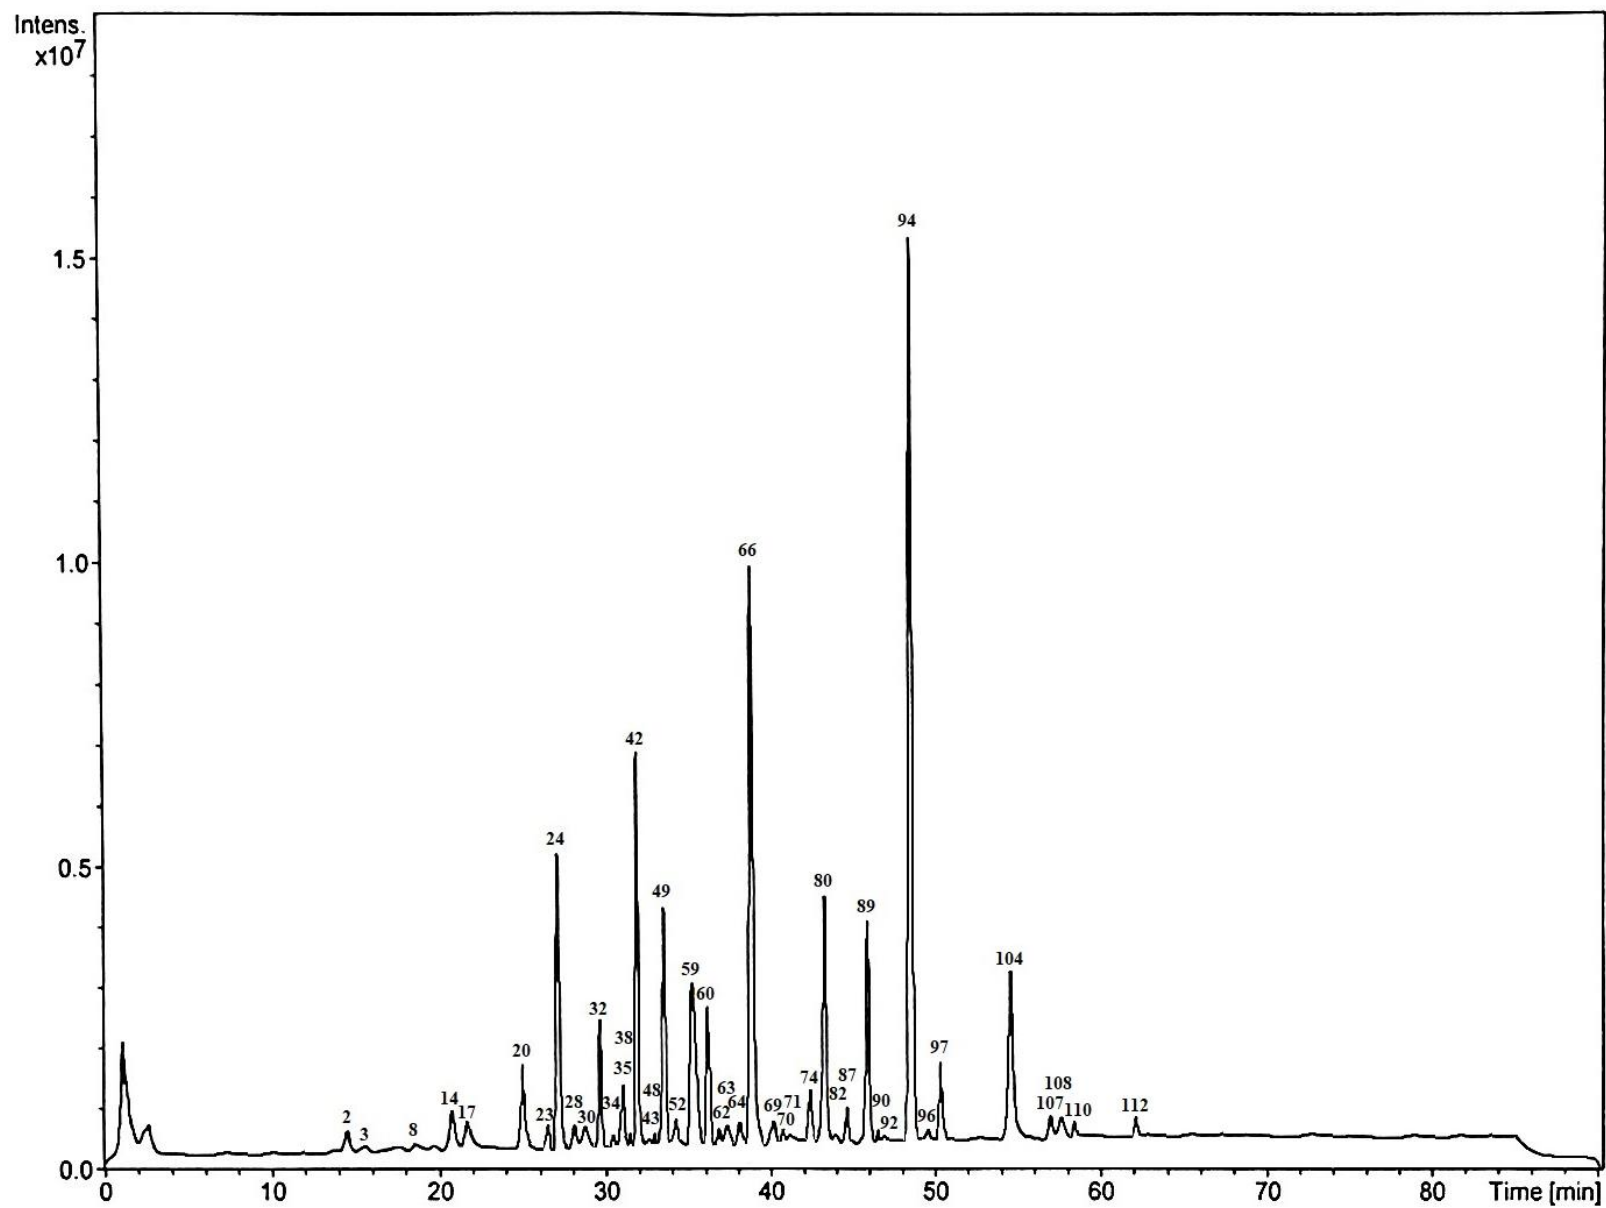

**Figure S5.** Representative LC-MS chromatogram of *M. pulegium* flower extract II (MPFE II). Peak numbers refer to compounds listed in Table 3.

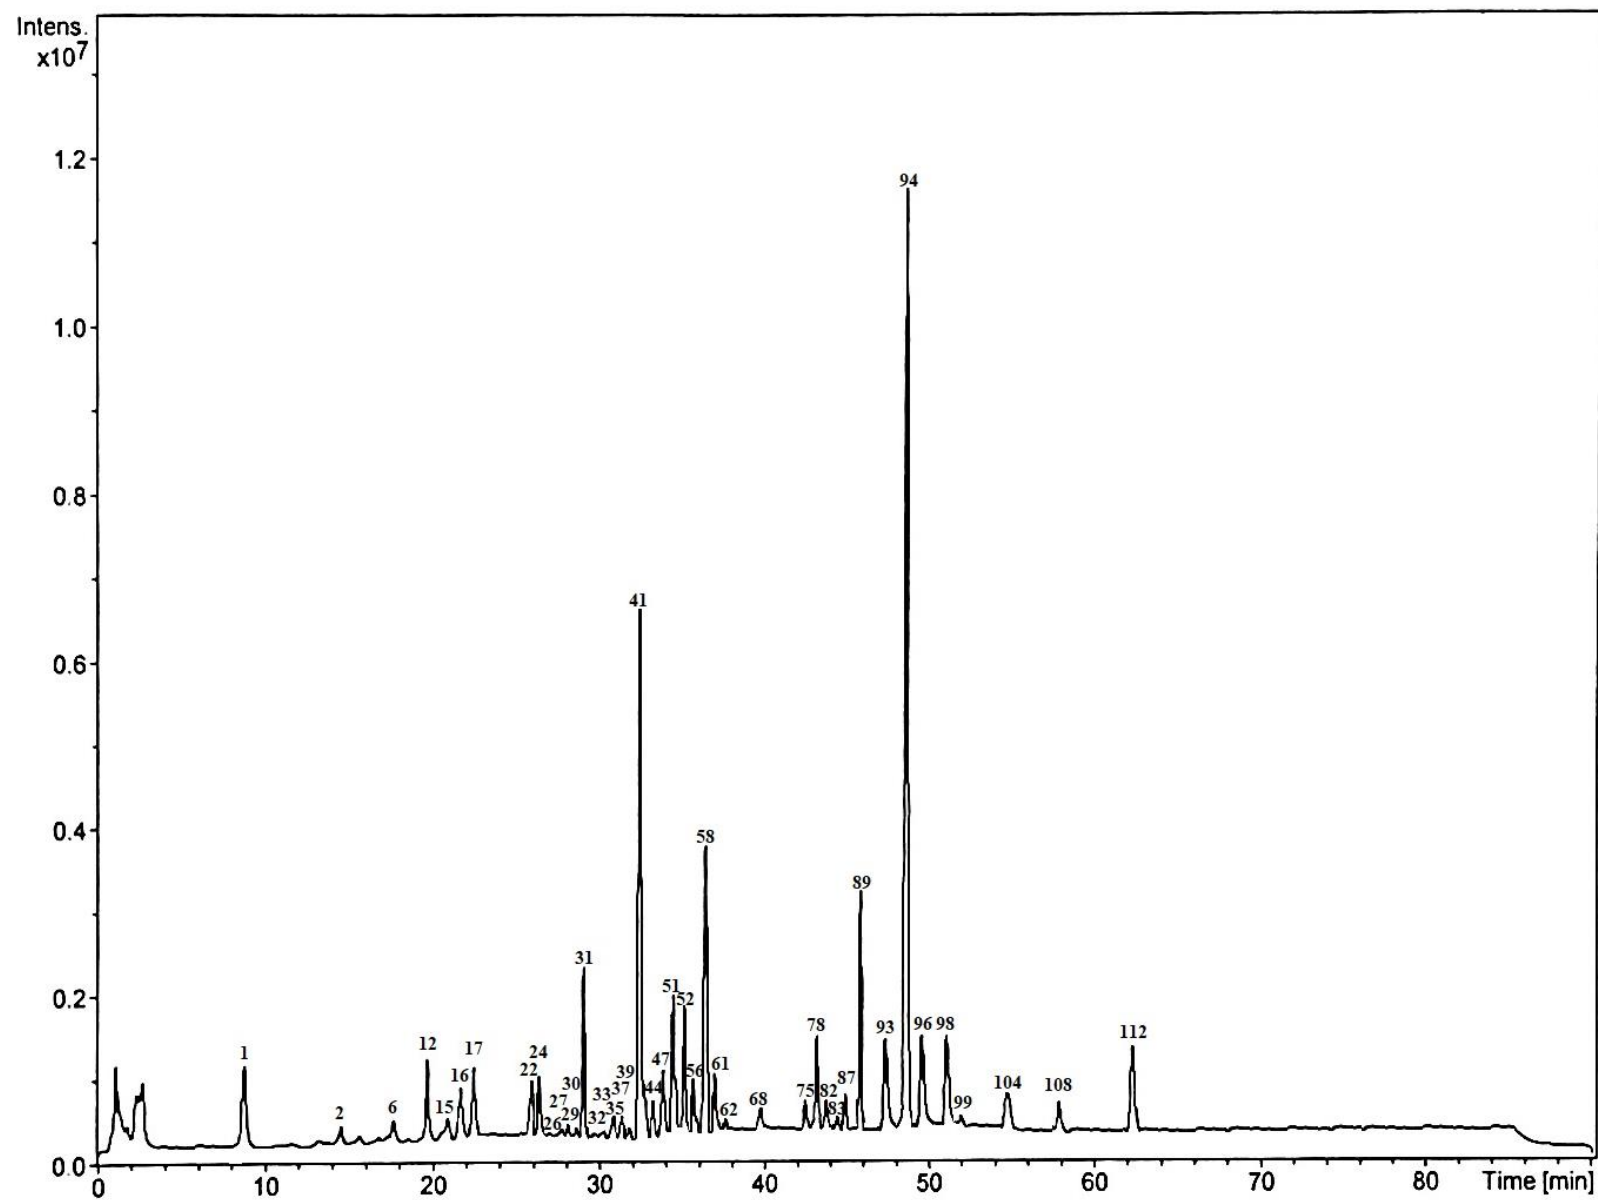

**Figure S6.** Representative LC-MS chromatogram of *M. pulegium* flower extract III (MPFE III). Peak numbers refer to compounds listed in Table 3.
